# Supplementary material for: Ultrafast nano-structuring of superwetting Ti foam with robust antifouling and stability towards efficient oil-in-water emulsion separation
Source: Royal Society of Chemistry journal article supplement (doi:10.1039/c9nr04381k), 2019-01-01
Supplement: c9nr04381k1.pdf [file c9nr04381k1.pdf]

## Electronic Supporting Information

# **Ultrafast nano-structuring of superwetting Ti foam with robust antifouling and stability towards efficient oil-in-water emulsion separation**

Shuai Yang,<sup>‡a</sup> Kai Yin,<sup>‡\*a,b</sup> Junrui Wu,<sup>a</sup> Zhipeng Wu,<sup>a</sup> Dongkai Chu,<sup>c</sup> Jun He<sup>\*a</sup> and Ji-An Duan<sup>b</sup>

*<sup>a</sup>Hunan Key Laboratory of Super Microstructure and Ultrafast Process, School of Physics and Electronics, Central South University, Changsha, 410083, China*

*<sup>b</sup>The State Key Laboratory of High Performance and Complex Manufacturing, College of Mechanical and Electrical Engineering, Central South University, Changsha 410083, China*

*<sup>c</sup>The Institute of Optics, University of Rochester, Rochester, NY 14627, USA.*

This file contains Supplementary Figures S1-S6 and Table S1.

\*To whom correspondence should be addressed.

\*Corresponding author: kaiyin@csu.edu.cn, junhe@csu.edu.cn

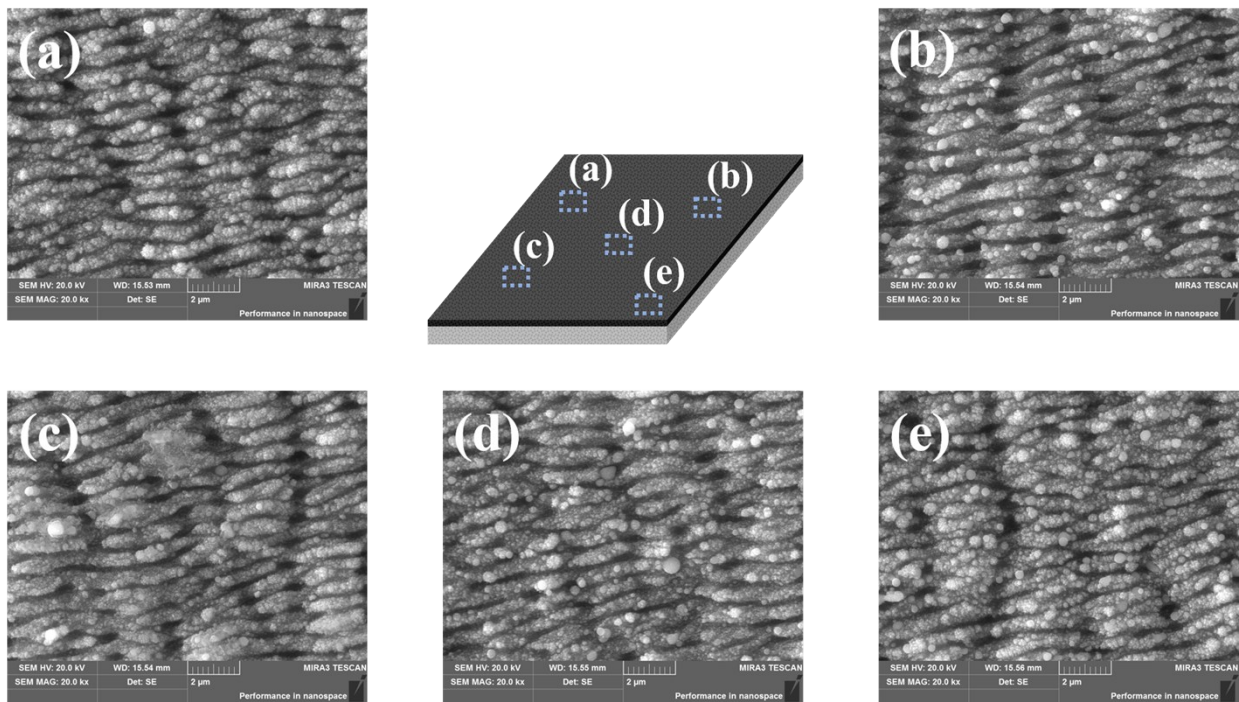

Figure S1. SEM images of different positions on the laser treated Ti foam.

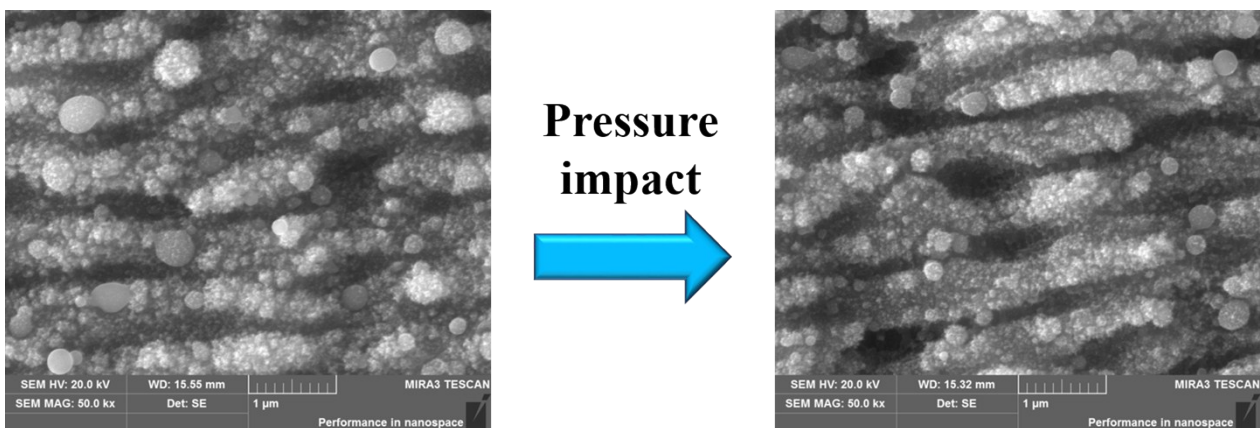

Figure S2. SEM images of laser treated Ti foam before and after oil-in-water emulsion separation under -5 kPa pressure.

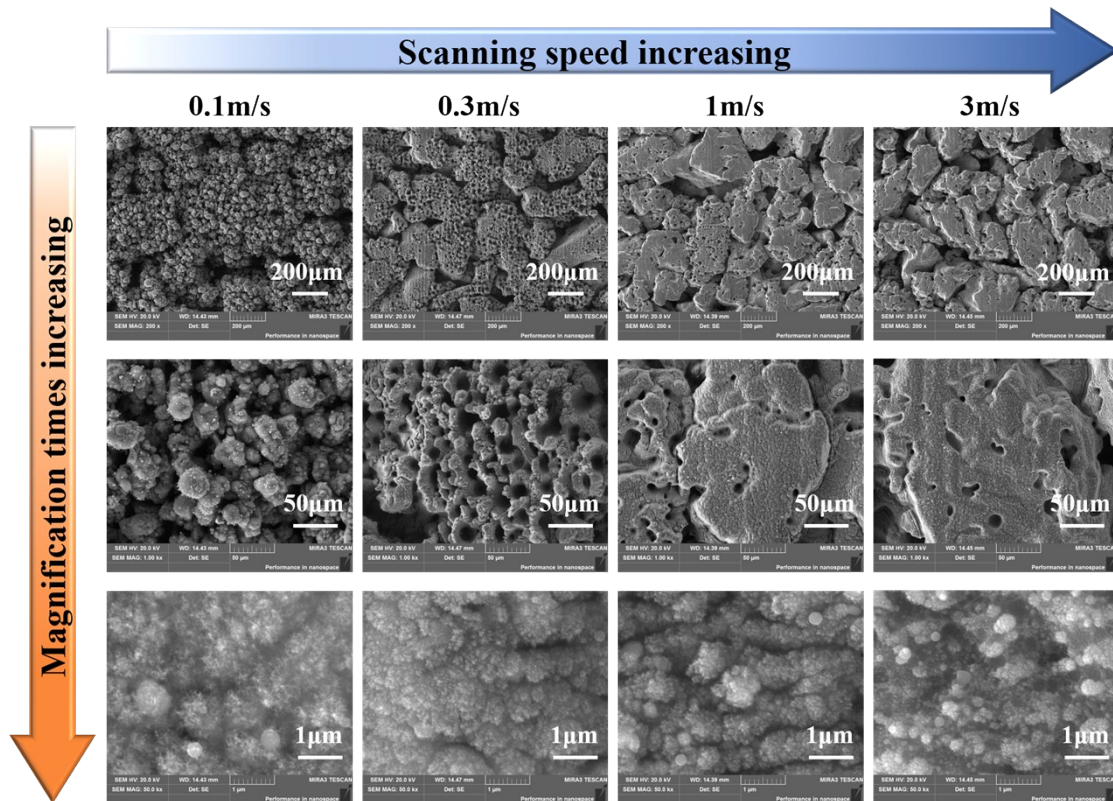

Figure S3. SEM pictures of different laser treated structures with various scanning speeds. The downsets are corresponding magnified pictures. (Laser power: 8 W)

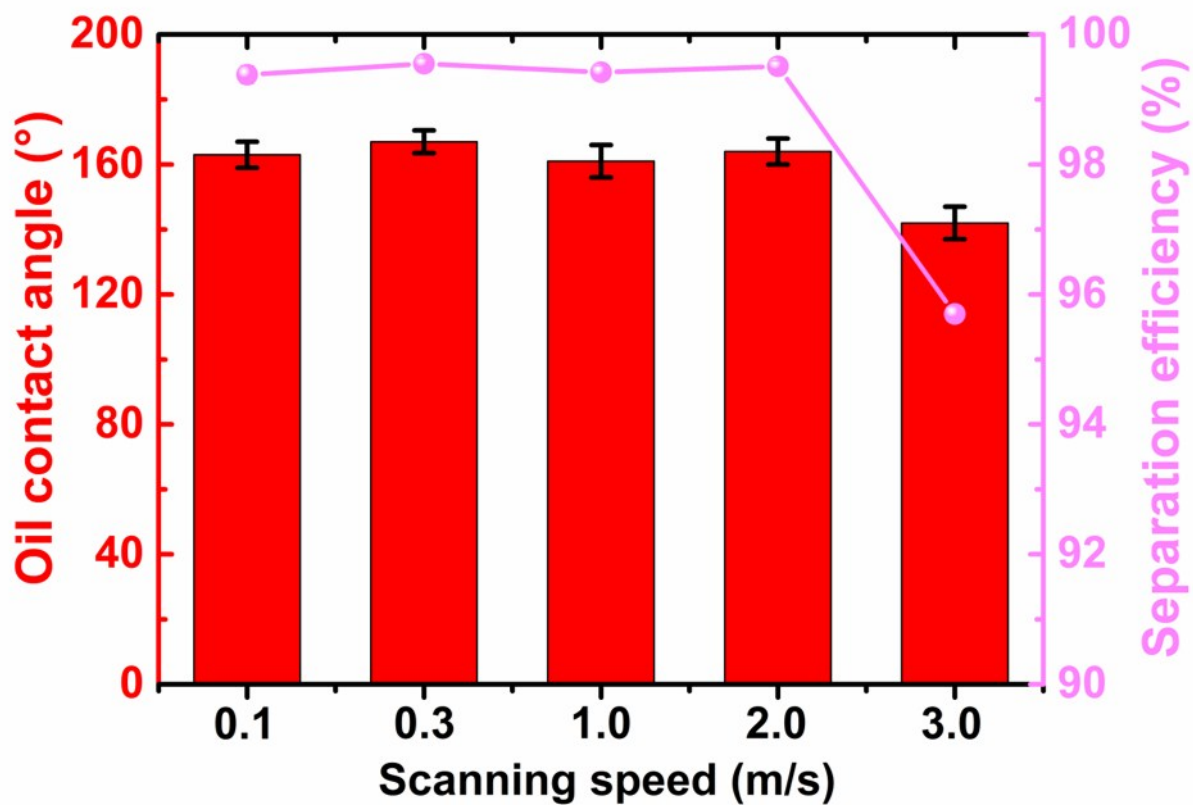

Figure S4. Oil contact angle and separation efficiency of Ti foam processed by different scanning speeds

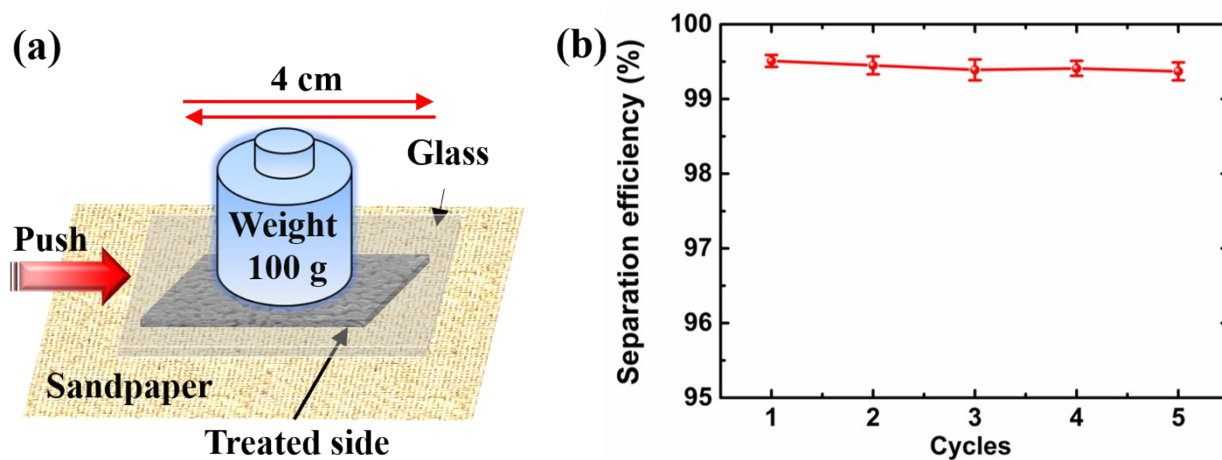

Figure S5. (a) Schematic of the sandpaper abrasion tests for the laser treated Ti foam. (b) Separation efficiency as a function of abrasion cycle number.

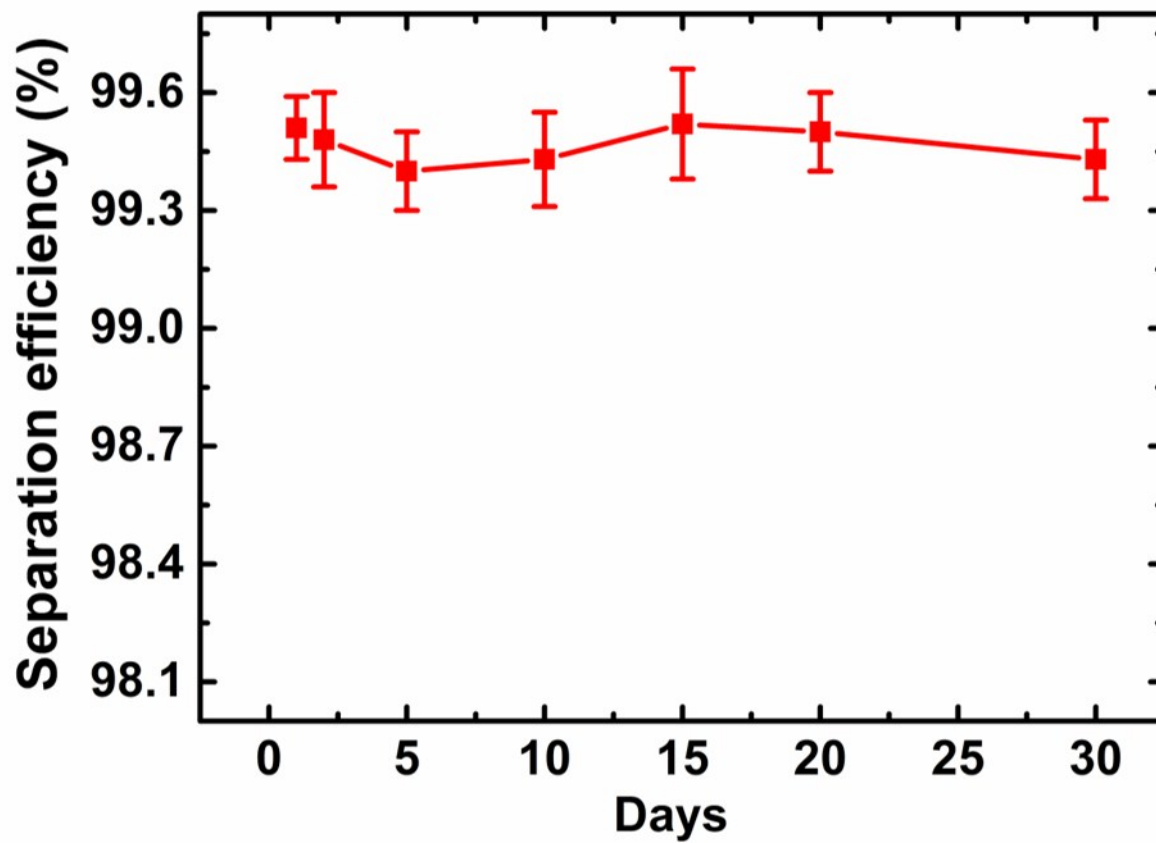

Figure S6. Separation efficiency of laser treated Ti foam by different days.

**Table S1.** Comparison of preparation efficiency for the oil-in-water emulsion separation materials

| <b>Wettability of materials</b>                          | <b>Size</b>                   | <b>Time consuming</b>    | <b>Ref.</b> |
|----------------------------------------------------------|-------------------------------|--------------------------|-------------|
| Superhydrophilic and underwater superoleophobic mesh     | $3.5 \times 3.5 \text{ cm}^2$ | Four steps, >10 hour     | 27          |
| Superhydrophilic and underwater superoleophobic Membrane | -                             | Three steps, >42 hours   | 26          |
| Superhydrophilic and underwater superoleophobic Ti foam  | $3.0 \times 3.0 \text{ cm}^2$ | Several steps, >8 hours  | 28          |
| Superhydrophilic and underwater superoleophobic Ti foam  | $3.0 \times 3.0 \text{ cm}^2$ | Several steps, >4 hours  | 29          |
| Superhydrophobic membrane                                | -                             | Several steps, >15 hours | 24          |
| Superhydrophilic and underwater superoleophobic mesh     | $5.0 \times 5.0 \text{ cm}^2$ | Several steps, >4 hours  | 25          |
| Superhydrophilic and underwater superoleophobic Ti foam  | $2.3 \times 2.6 \text{ cm}^2$ | one step, <1 minutes     | This work   |

Note: Time consuming is the minimum time listed in the above ref.
